# Supplementary material
Source: PubMed Central journal article supplement (PMC11329212)
Supplement: NIHMS1531268-supplement-1.pdf [file NIHMS1531268-supplement-1.pdf]

**Prior to elective anatomic lung resection (excluding pneumonectomy) which of the following do you do:**

|                                                                  | Always                | Usually               | Sometimes             | Rarely                | Never                 |
|------------------------------------------------------------------|-----------------------|-----------------------|-----------------------|-----------------------|-----------------------|
| <b>Order spirometry testing</b>                                  | <input type="radio"/> |
| <b>Calculate postoperative predicted FEV1</b>                    | <input type="radio"/> |
| <b>Order diffusion capacity (DLCO) testing</b>                   | <input type="radio"/> |
| <b>Calculate postoperative predicted DLCO</b>                    | <input type="radio"/> |
| <b>Repeat pulmonary function tests after neoadjuvant therapy</b> | <input type="radio"/> |

reset

**Prior to elective anatomic lung resection (excluding pneumonectomy), to determine whether a patient needs cardiac evaluation, I:**

|                                                                   | Always                | Usually               | Sometimes             | Rarely                | Never                 |
|-------------------------------------------------------------------|-----------------------|-----------------------|-----------------------|-----------------------|-----------------------|
| <b>Inquire about activity/functional status</b>                   | <input type="radio"/> |
| <b>Calculate the Thoracic Revised Cardiac Risk Index (ThRCRI)</b> | <input type="radio"/> |
| <b>Assess for cardiovascular risk factors</b>                     | <input type="radio"/> |

reset

reset

reset

reset

reset

reset

**For patients who need additional cardiac evaluation, I begin the assessment with:**

- Echocardiogram
- Exercise stress test
- Pharmacologic stress test
- Cardiopulmonary exercise testing (CPET)
- Other
- None, I refer directly to a Cardiologist

reset

**I refer my patients with borderline pulmonary function for preoperative pulmonary rehabilitation**

- Always
- Usually
- Sometimes
- Rarely
- Never

reset

**I refer my patients with borderline pulmonary function for postoperative pulmonary rehabilitation**

- Always
- Usually
- Sometimes
- Rarely
- Never

reset

## Demographics

**How would you characterize your clinical practice?**

- General Thoracic Surgery
- Cardiothoracic Surgery with mostly Cardiac Surgery cases

reset

**How many years have you been in practice (beyond training)?**

**Which best characterizes your practice?**

- Private
- Health maintenance organization
- University/academic

reset

**What is your age?**

- <30 years old
- 30-39 years old

- 40-49 years old
- 50-59 years old
- 60-69 years old
- ≥70 years old

reset

**What is your gender?**

- Male
- Female

reset

Submit

Save & Return Later
